# Supplementary material for: Prevalence and molecular characterization of antibiotic resistance and associated genes in Klebsiella pneumoniae isolates: A clinical observational study in different hospitals in Chattogram, Bangladesh
Source: PubMed Central journal article supplement (PMC8432802; doi:10.1371/journal.pone.0257419), 2021-09-10
Supplement: pone.0257419.s003.pdf [file pone.0257419.s003.pdf]

Gel images of ...  
NDM-1, SHV-11, uge (Figure 3)  
Plasmid size (Figure 6)

NDM-1

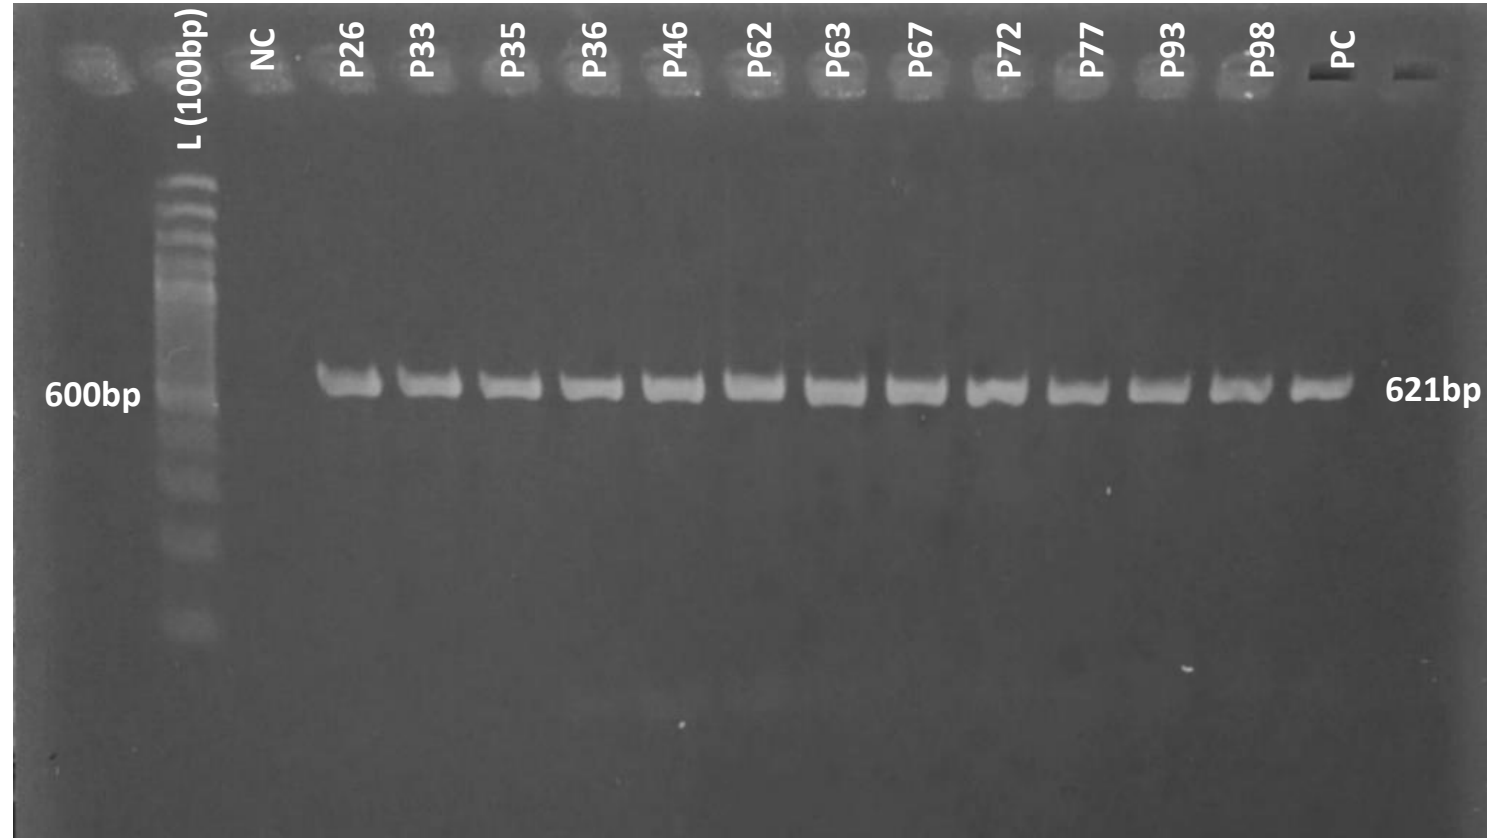

# SHV-11

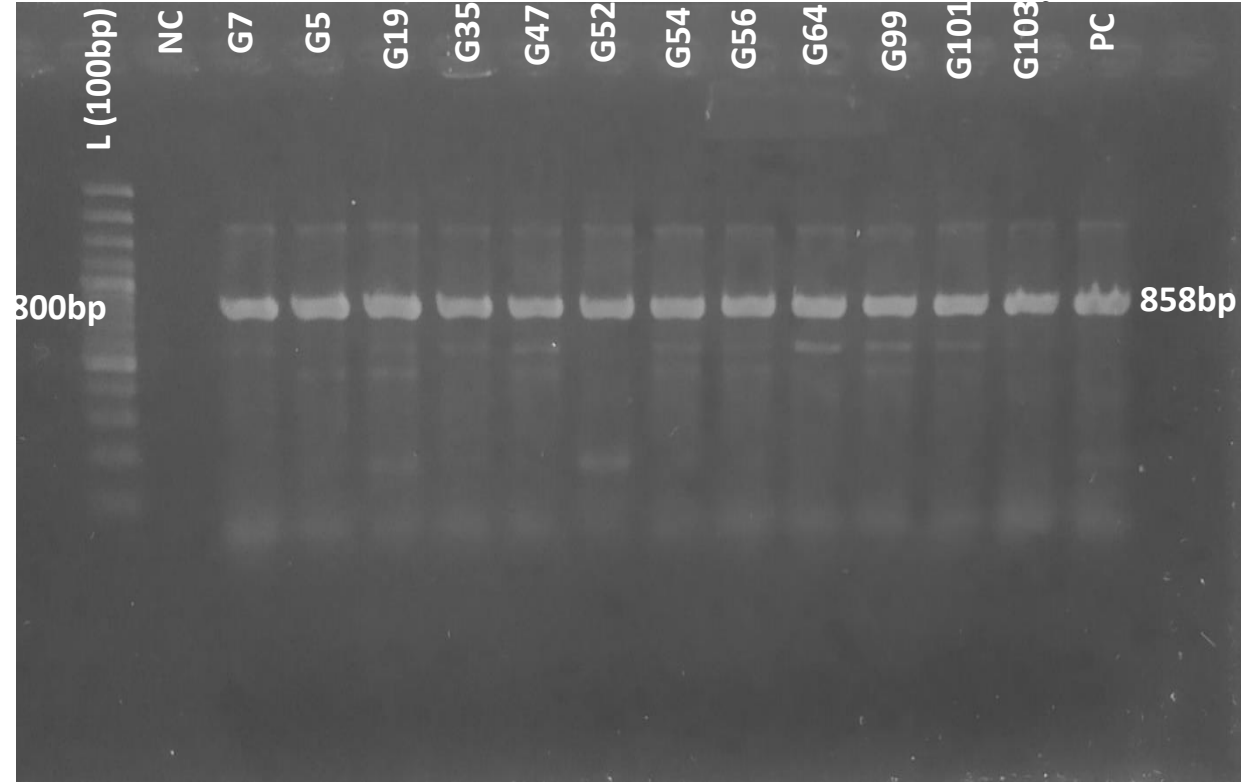

# UGE

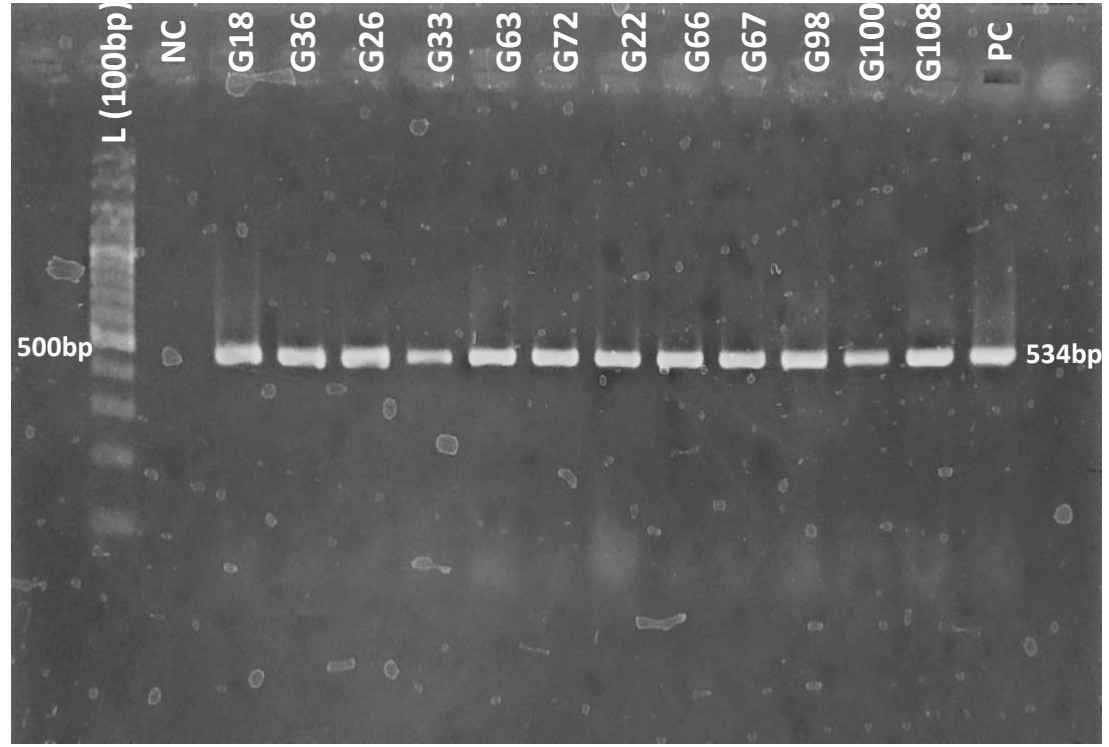

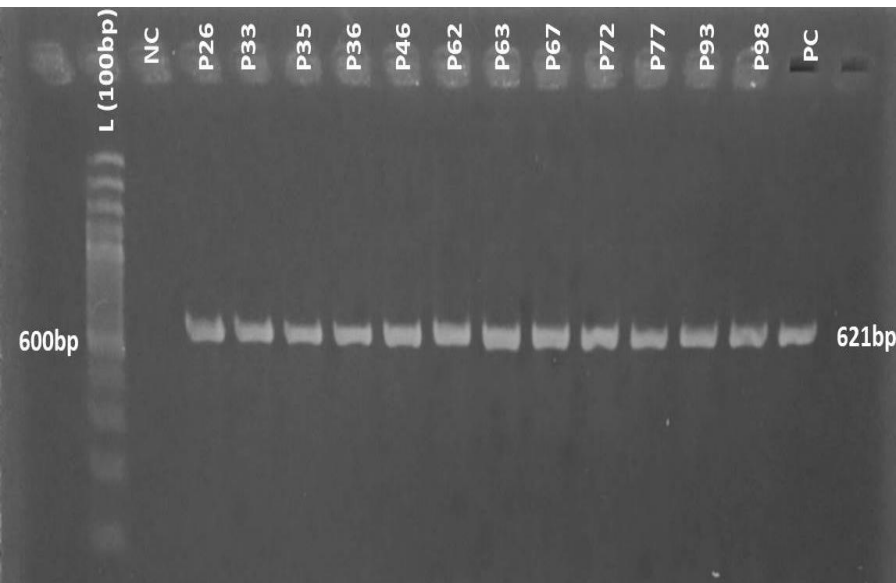

**A. *bla*<sub>NDM-1</sub>**

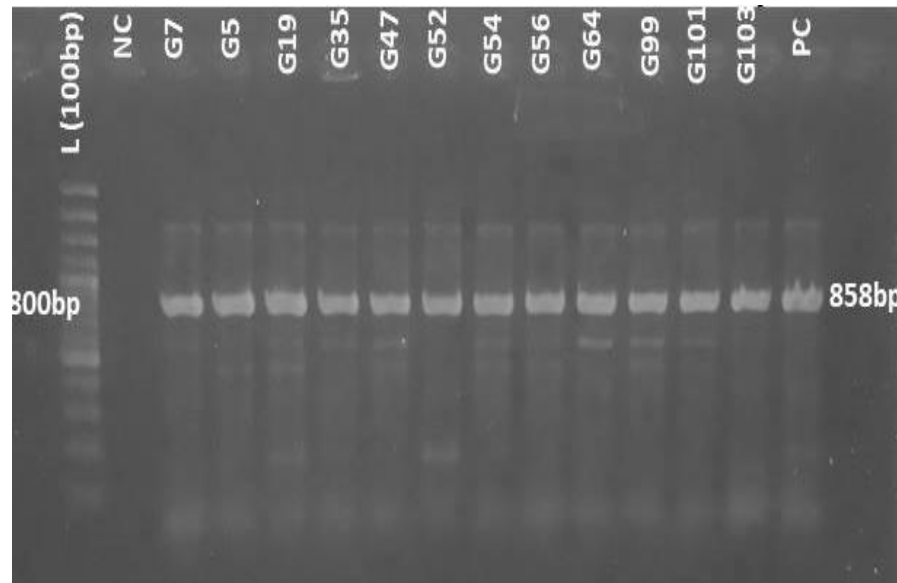

**B. *bla*<sub>SHV-11</sub>**

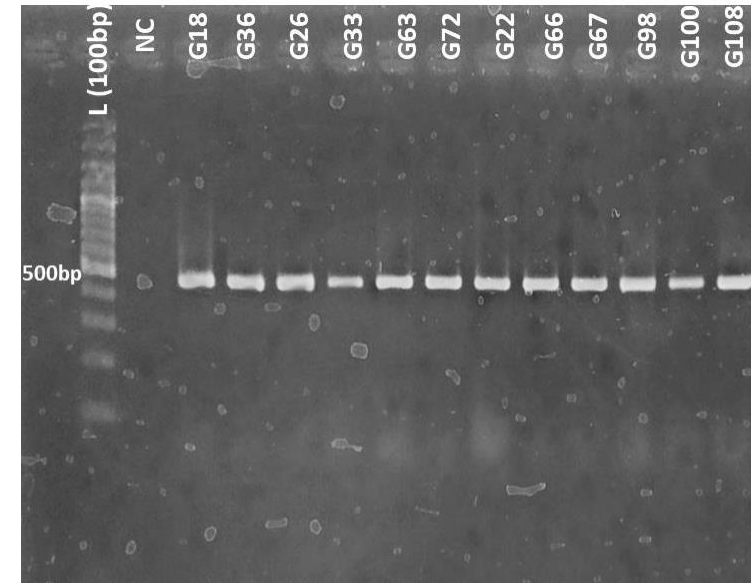

**C. *uge***

**Figure 3: Amplification and confirmation of *bla*<sub>NDM-1</sub>, *bla*<sub>SHV-11</sub>, and *uge* genes by polymerase chain reaction.** PCR products were visualized in 1.5% agarose gel using ethidium bromide staining (0.5%). L indicates Ladder (100 bp); NC as a negative control(Nuclease free water); PC indicates positive control, *K. pneumoniae* ATCC70603. (A) samples representing bands with 621bp were *bla*<sub>NDM-1</sub> positive amplicons similarly, (B) samples were *bla*<sub>SHV-11</sub> positive amplicons with 858bp, (C) samples were *uge* positive amplicons having 534bp.

# Plasmid profiling (Figure 6)

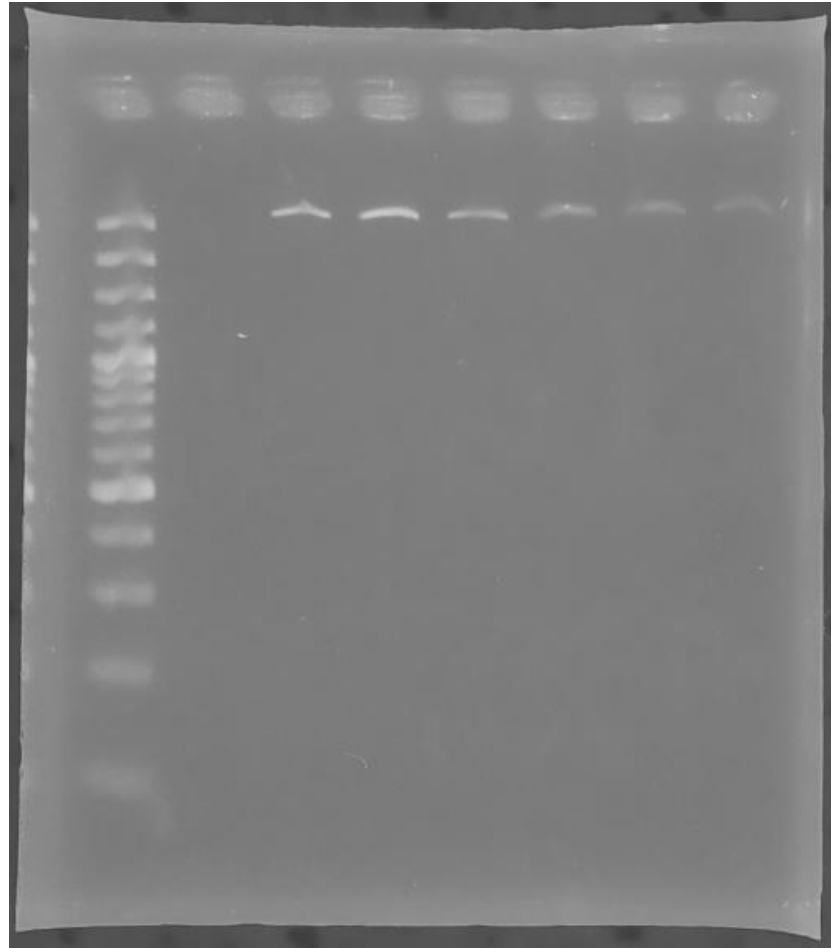

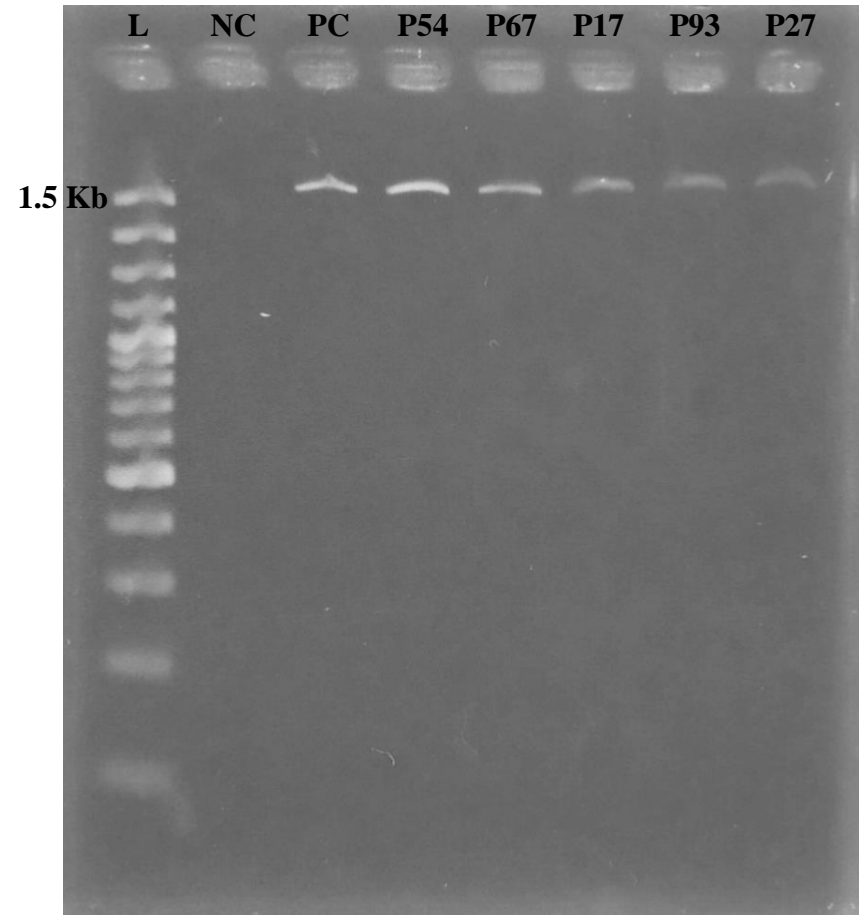

**Figure 6: Detection of plasmid by Agarose gel electrophoresis.**
