# Supplementary material for: Prevalence and molecular characterization of antibiotic resistance and associated genes in Klebsiella pneumoniae isolates: A clinical observational study in different hospitals in Chattogram, Bangladesh
Source: PubMed Central journal article supplement (PMC8432802; doi:10.1371/journal.pone.0257419), 2021-09-10
Supplement: pone.0257419.s008.pdf [file pone.0257419.s008.pdf]

**Prevalence of antibiotic resistance and associated genes among clinical isolates of  
*Klebsiella pneumoniae* in the southern region of Bangladesh**

Reviewer's recommendations

After reviewing the requested changes, the article is considered ready for publication.  
Congratulations to the authors for their effort and dedication.
